RESEARCH ARTICLE

# Myocardial infarction and alcohol consumption: A case-control study

Milena Ilic<sup>1\*</sup>, Sandra Grujicic Sipetic<sup>2</sup>, Branko Ristic<sup>3</sup>, Irena Ilic<sup>4</sup>

**1** Department of Epidemiology, Faculty of Medical Sciences, University of Kragujevac, Kragujevac, Serbia, **2** Institute of Epidemiology, Faculty of Medicine, University of Belgrade, Belgrade, Serbia, **3** Clinic for Orthopedic Surgery and Traumatology, Clinical Center Kragujevac, Faculty of Medical Sciences, University of Kragujevac, Kragujevac, Serbia, **4** Faculty of Medicine, University of Belgrade, Belgrade, Serbia

\* [drmilenaalic@yahoo.com](mailto:drmilenaalic@yahoo.com)

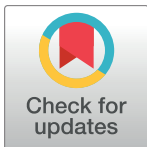

## Abstract

### Background

Although epidemiological evidence for the beneficial effect of low alcohol consumption on myocardial infarction is strong, the impact of heavy drinking episodes is less clear.

### Objectives

The aim of this study was to investigate a possible association between the risk for acute myocardial infarction occurrence and alcohol consumption.

### Methods

Our hospital-based case-control study comprised 374 participants (187 newly diagnosed patients with myocardial infarction and 187 controls, individually matched by gender, age, and place of residence). This study was performed in Kragujevac (a city in Serbia) during 2010. Logistic regression analysis was used to determine odds ratio (OR) with 95% confidence intervals (95% CI).

### Results

The history of alcohol consumption in patients with acute myocardial infarction and their controls did not differ significantly: the percentage of those that were consuming alcohol was slightly higher in cases (54.5%) than in controls (50.3%). The habit of binge drinking during the previous 12 months was significantly more common in cases (25.1%) than in controls (12.8%): adjusted OR = 2.2 (95%CI = 1.2–4.2,  $p = 0.017$ ),  $p$  for trend = 0.015. Analysis of binge drinking by age, gender and place of residence revealed that the increase in risk for acute myocardial infarction was associated with older age (adjusted OR = 5.1, 95%CI = 1.7–15.1,  $p$  for trend = 0.010), male gender (adjusted OR = 2.3, 95%CI = 1.1–5.2,  $p$  for trend = 0.028) and rural place of residence (adjusted OR = 4.8, 95%CI = 1.3–18.5,  $p$  for trend = 0.033).

## OPEN ACCESS

**Citation:** Ilic M, Grujicic Sipetic S, Ristic B, Ilic I (2018) Myocardial infarction and alcohol consumption: A case-control study. PLoS ONE 13 (6): e0198129. <https://doi.org/10.1371/journal.pone.0198129>

**Editor:** Antonio Palazón-Bru, Universidad Miguel Hernandez de Elche, SPAIN

**Received:** November 19, 2017

**Accepted:** May 14, 2018

**Published:** June 4, 2018

**Copyright:** © 2018 Ilic et al. This is an open access article distributed under the terms of the [Creative Commons Attribution License](https://creativecommons.org/licenses/by/4.0/), which permits unrestricted use, distribution, and reproduction in any medium, provided the original author and source are credited.

**Data Availability Statement:** All relevant data are available within the paper, its Supporting Information files and from the Harvard Dataverse (<https://doi.org/10.7910/DVN/MA1X0>).

**Funding:** This work was supported by the Ministry of Education and Science of Republic of Serbia, through contract no. 175042. The funders had no role in study design, data collection and analysis, decision to publish, or preparation of the manuscript.

**Competing interests:** The authors have declared that no competing interests exist.

## Conclusion

Our results suggest that binge drinking is associated with twice the risk for myocardial infarction compared to not drinking. Since consumption of alcohol is very common in the Serbian population, the effect of binge drinking on myocardial infarction should be considered an important public health issue.

## Introduction

Myocardial infarction represents death of myocard cells due to irreversible ischemia progressing to necrosis [1,2]. According to the World Health Organization's estimates, every year approximately 6 million people around the world experience a myocardial infarction, and the lethal outcome occurs in over 25% of cases [1]. Mortality rates for myocardial infarction are dropping in North America and many North and West European countries, while in Central and East Europe these rates are increasing [3]. In 2014, over 16560 people (10270 men and 6290 women) in Serbia suffered a heart attack, and over 5000 people died (around 3000 men and 2000 women) [4,5]. It is estimated that around two thirds of the myocardial infarction mortality rates decline in developed countries are due to reduced exposure to risk factors, while the last third is the result of adequate treatment and improved survival [6].

Etiology of myocardial infarction is complex and still not completely elucidated [7,8]. Age, smoking, hypertension, high cholesterol levels, diabetes mellitus and male sex are recognized as major risk factors for myocardial infarction [8]. Other risk factors include obesity, physical inactivity, dietary factors, positive family history and psychosocial factors. However, in some developing countries, the contribution of established myocardial infarction risk factors is not entirely known. The results available to date suggest a significant presence of conventional risk factors for acute myocardial infarction not only in patients, but also among controls (especially those under 60 years of age) [9–11]. The "INTERHEART" study, which involved participants from 52 countries, pointed out that in different parts of the world different risk factors were responsible for the development of myocardial infarction: factors which showed the strongest link with the development of myocardial infarction in Africa were diabetes and hypertension, in South America it was obesity and smoking, while the most important risk factors in Croatia were current smoking, diabetes, higher ApoB/Apo A-1 ratio, obesity and hypertension, while alcohol consumption was found to be protective [12].

Numerous epidemiological studies showed that moderate alcohol consumption might decrease cardiovascular mortality [13, 14] and was associated with reduced cardiovascular risk [15–17]. Tavani et al [18] found that alcohol consumption inversely correlated with non-fatal myocardial infarction, independent of the type of alcohol beverage, but related to the duration of alcohol consumption. A population-based case control study in Spain showed that moderate alcohol consumption (up to 30 mg/day: including wine, beer and spirits) was related with a reduction in risk for non-fatal myocardial infarction, while heavy alcohol intake did not significantly reduce the risk [15]. A large study in China that included 64597 persons showed that alcohol consumption led to a lower risk for heart attack [19]. However, the protective effect of moderate alcohol consumption on myocardial infarction occurrence is lost when it is characterized by consumption patterns that include episodes of intake of large quantities of alcohol [10, 20–22].

Although epidemiological evidence for the beneficial effects of low alcohol consumption on myocardial infarction is strong, the impact of heavy drinking episodes is less clear [12,23].

Some studies have shown that heavy drinking, as well as binge drinking, can lead to acute myocardial infarction [23–25]. The “INTERHEART” study showed that episodes of binge drinking can lead to the onset of myocardial infarction and that especially in older people [26]. In one center in Northern Ireland (Belfast) and three centers in France (Lille, Strasbourg, and Toulouse), the hazard ratio for „hard coronary events”(incident myocardial infarction and coronary death) for binge drinkers compared with regular drinkers was 1.97 (95%CI = 1.21 to 3.22) in middle aged men [21]. Risk of a major coronary event for men who consumed  $\geq 9$  drinks in 24 hours before the onset of symptoms was 2.26 (95% CI = 1.06 to 4.81) compared with regular drinkers who consumed no alcohol in that period [27]. Population-based case-control study in New York [28] showed that frequency of episodic alcoholic intoxication of at least once/month or more was associated with a strongly increased risk of non-fatal myocardial infarction in women aged 35–69 years compared to abstinence (OR = 2.90; 95%CI = 1.01–8.29), while compared to current drinkers who never drink to this extent the risk was 6.22 (95%CI = 2.07–18.69). A nested case-control study in Sweden recorded that taking large amounts of alcohol on a single occasion was associated with an increased risk for myocardial infarction in women but not in men [29]. The beer binge drinking is associated with increased risk of fatal acute myocardial infarction in men (Kuopio, Finland) whose usual intake of beer was 6 or more bottles per session compared with men who usually consumed less than 3 bottles (relative risk was 6.50, 95%CI = 2.05–20.61) [30]. Any heavy drinking occasion was associated with a two times higher mortality from ischaemic heart disease in former drinkers compared with former drinkers without such heavy drinking occasions, and in current drinkers compared with current drinkers with average daily intake of one to two drinks [31].

A very small number of analytical epidemiological studies on the etiology of acute myocardial infarction have been conducted in Serbia. The aim of this paper was to assess the link between alcohol consumption and risk for acute myocardial infarction in our population.

## Methods

### Study design

This hospital-based case-control study was performed in Kragujevac (a city in Serbia with about 200,000 inhabitants) during 2010. The Clinical Center in Kragujevac, one of the four clinical centers in the country, provides tertiary health care.

The healthcare system in Serbia is free to access, universal, and covers all citizens and permanent residents. This system is free of direct charge, because all employees must pay contributions to it. The network of health care institutions throughout Serbia is organized on three levels—the primary, secondary and tertiary healthcare providing level. With political and social changes since 2000, there have been some improvements of the health system and general living circumstances in Serbia [32]. The Human Development Index values had a rising trend since 2000 (0.726), reaching 0.767 in 2010. Diagnosis and treatment of ischemic heart disease, especially myocardial infarction, have significantly improved in the last 5–10 years, and Serbia now has an epidemiological pattern similar to that in most of the neighboring countries.

### Study population

The study population consisted of newly diagnosed patients with their first myocardial infarction according to the diagnostic criteria based on the European Society of Cardiology/American College of Cardiology consensus guidelines: specific symptoms of acute myocardial infarction, changes in the blood levels of specific enzymes and/or acute myocardial infarction-

specific electrocardiogram changes [2]. All cases were hospitalized at the Clinical Center in Kragujevac. No one refused to participate in the study.

Controls were selected among patients who were hospitalized at the same time in the Clinical Center in Kragujevac, without either a diagnosis or a history of myocardial infarction, or any other cardiovascular disease. Controls consisted of patients who were, due to other diseases or conditions (such as closed or open fracture of the arms, legs or ribs, gonarthrosis, coxarthrosis, etc), hospitalized at the Clinic for Orthopedic Surgery and Traumatology, Clinical Center in Kragujevac. All selected controls were interviewed; no one refused to participate.

Cases and controls were individually matched by gender, age ( $\pm 2$  years) and place of residence (rural / urban). All cases and controls fulfilled the same criteria for inclusion of participants in the study (they gave voluntary consent and had no criteria for exclusion). Exclusion criteria for the study were age of 18 years or less, positive history of a psychiatric illness, pregnancy and lactation, refusal to participate in research or any other objective reason that did not allow or hindered participation in the study.

### Ethics considerations

This study was conducted according to the guidelines laid down in the Declaration of Helsinki and all procedures involving human subjects were approved by Ethics Committee of the Faculty of Medical Sciences, University of Kragujevac (Ref. No.: 01–529), and by the Ethics Committee of the Clinical Center Kragujevac (Ref. No.: 01–13815). Informed verbal consent was obtained from both cases and controls prior to the interview. Prior to obtaining a verbal consent, the medical doctors who conducted the interview thoroughly informed the participants of the details and purpose of the study, after which the medical doctors conducting the interview signed the questionnaire. At the time when our study was started, the Ethics Committee of the Clinical Center in Kragujevac did not require a written and signed informed consent for studies without any clinical examination that involve only interviews, such as our case-control study. The interviews were always conducted in the hospital. The interview took approximately 2 hours. A questionnaire was completed through face-to-face interviews conducted by trained interviewers (medical doctors). The mean time interval between diagnosis and interview of cases and controls was 2 weeks.

### Sample size calculation

The overall sample calculation was based on the results of previously published studies of similar design. According to the data from the "INTERHEART study", the probability of exposure to the investigated risk factor (alcohol) in the control group was 47.14% [12]. With a two sided probability of the type I error alpha of 5%, based on the power of 80%, the assumed coefficient of correlation for exposure to the examined factor between the matched cases and the controls of  $r = 0.2$ , based on the applied matching and cases:controls ratio of 1:1, it is estimated that the minimum sample size required to detect the true odds ratio greater than 2.0 or less than 0.55 is 167 participants in each group. The StatsDirect statistical software (Version 3.0.184, Stats Direct Ltd, 9 Bonville Chase, Altrincham, Cheshire WA14 4QA, United Kingdom) was used to calculate the sample size.

### Data collection

The epidemiological questionnaire and medical records were used as data sources in this study. The data on each participant were collected by a face-to-face interview, which lasted approximately 1.5–2 hours and was conducted by trained interviewers (medical doctors). Besides the questions about socio-demographic characteristics, the questionnaire contained

questions on the exposure to potential risk factors and protective factors for acute myocardial infarction, as well as the habit of alcohol consumption (alcohol consumption anytime during lifetime, those who consumed were then asked about frequency, time of the beginning and duration of alcohol consumption, types of alcoholic beverages, average amount of beverages per day, binge drinking, cessation of consumption, duration of abstinence; additionally, we asked about frequency and amount of alcohol intake for 11 types of alcoholic beverages during the last 10 years in the special part of the questionnaire which contained questions of food intake).

Demographic variables included occupation, education level, marital status. Occupation was categorized as manual worker, farmer, clerk, professional and housewife (for retired the occupation before retirement was shown). Education level was categorized as low ( $\leq 8$  years), and high ( $> 8$  years). Marital status was dichotomized as with partner versus without partner. Anthropometric measurements (weight and height) of the participants were taken using the standard instruments and techniques. Degree of obesity was estimated based on the body mass index (BMI): subjects with  $\text{BMI} \geq 25 \text{ kg/m}^2$  were considered overweight [33]. Data on family history of myocardial infarction, personal medical history (hypertension, diabetes mellitus, hypercholesterolemia, disorders of thyroidea, etc), oral contraceptive use, the presence of stressful events (death, stress in the family, financial stress, stress at work, etc) in the previous 12 months, use of tobacco, coffee and alcohol were collected. Participants were considered as smokers if they regularly smoked at least one cigarette per day or approximately 30 g of tobacco per month for one year. Participants were classified as current smokers if they had smoked at least one cigarette every day for the last 12 months, and as former smokers if at least one year passed since smoking cessation.

Data on alcohol consumption were related to the regular intake of any amounts of these beverages. Participants were also questioned about the frequency of alcohol consumption anytime during lifetime (never, sometimes, every day), quantity of alcohol (standard bottle of beer, as well as a glass of wine and a shot of spirits were used as measures of consumption), age at the time of the beginning of consumption ( $< 20$  years,  $\geq 20$  years), duration of consumption ( $< 30$  years,  $\geq 30$  years), cessation of consumption, the duration of abstinence ( $\leq 10$  years,  $> 10$  years). Also, participants were questioned about the habit of drinking alcohol during the last 10 years before the onset of the present illness: the frequency of consumption (daily, weekly, monthly) and the amount of consumption (bottle of 500 ml for beer, glass of 200 ml for wine, shot of 50 ml for spiriths) for 11 types of alcoholic beverages (rakija, cognac, brandy, vodka, whiskey, liqueur, vermouth, white wine, rose wine, red wine and beer). Based on the data on the frequency and amount of consumption, the average individual daily intake for each type of alcoholic beverage was determined. If significant changes in the consumption had happened during the observed period, habits before the change were recorded. Participants were classified as daily drinkers if they had drunk at least one drink every day for the last 12 months, and as former drinkers if at least one year passed since drinking cessation.

The total daily amount of consumption for each drink item was calculated and then finally converted into „pure” alcohol using food consumption tables [34]. In Serbia, a „standard” drink is any drink that contains about 13 grams of „pure” alcohol [34]. Daily quantity of alcohol consumption was categorized based on the total amount of pure alcohol per day (g), into two groups ( $\leq 13$ ,  $> 13$ ).

Binge drinking was defined as the consumption of 5+ standard drinks for men and 4+ standard drinks for women on one occasion at least once a month during the last year preceding the onset of the myocardial infarction for cases and the current illness for controls.

## Statistical analysis

A descriptive analysis was performed for categorical variables by using absolute and relative frequencies. Differences were analyzed using the univariate logistic regression model between subgroups of age, gender, place of residence, education level, marital status, body mass index, oral contraceptive use, history of diabetes mellitus, hypertension, hypercholesterolemia, disorders of thyroidea, stressful events, family history of myocardial infarction, cigarette smoking and coffee consumption. Additionally, the univariate logistic regression model was used for analysis of characteristics of patients with acute myocardial infarction and their controls, according to alcohol consumption history.

Univariate and multivariate logistic regression models were performed to estimate the odds ratio (OR) with 95% confidence interval (95% CI) in order to assess the relationships between alcohol consumption and myocardial infarction occurrence. Multivariate logistic regression analysis was used to estimate the adjusted odds ratio with the aim of determining the independent risk factors for myocardial infarction associated with a history of alcohol consumption. Adjustment was made for all variables that were related to myocardial infarction in univariate analyses at a  $p$  value of  $<0.10$  (body mass index, positive personal medical history for diabetes mellitus, hypertension, hypercholesterolemia, and disorders of thyroidea, family history of myocardial infarction, stressful events, and tobacco use). Model fit was assessed by the Hosmer-Lemeshow test of goodness of fit and Cox and Snell's and Nagelkerke's Pseudo R square measures, together with the calculation of the area under the ROC curve. A test for linear trend in risk was based on the logistic regression model. For binge drinking only, we performed subgroup analyses to explore further the effects of age, gender and place of residence, as the variables known from literature data as possible confounders for the association between alcohol consumption and acute myocardial infarction, although these variables were matched in the present study. Statistical significance was considered when  $p < 0.050$ . All statistical analyses were conducted using the Statistical Package for Social Sciences software (SPSS Inc, version 20.0, Chicago, IL).

## Results

### Participant characteristics

The case group with acute myocardial infarction and control group each consisted of 187 participants (Table 1). Cases and controls were individually matched by gender, age and place of residence. More than 50% of cases and controls were  $\leq 65$  years old. The mean age of cases was 63.2 years (standard deviation = 10.5), and the mean age of controls was 63.9 years (standard deviation = 10.4). A total of 72.7% of participants were from urban areas.

Cases and controls did not differ significantly in occupation, employment, education level, marital status, oral contraceptive use, coffee consumption. Significantly more participants were overweight (body mass index  $\geq 25\text{kg/m}^2$ ) among cases than in controls ( $p = 0.043$ ). Data from personal medical history showed that cases significantly more frequently had diabetes ( $p < 0.001$ ), hypertension ( $p = 0.003$ ) and hypercholesterolemia ( $p < 0.001$ ). Disorders of thyroidea were more frequently recorded in cases than controls ( $p = 0.088$ ). Presence of myocardial infarction in family history was significantly more common in cases (58.3%) than in controls (41.7%),  $p = 0.002$ . Stressful event was present in 79.7% cases and 62.0% controls ( $p < 0.001$ ). Cases and controls were significantly different in cigarette smoking habits (63.6% cases versus 51.3% controls,  $p = 0.021$ ).

Among participants who had ever consumed alcohol, a higher proportion of cases than controls had body mass index  $\geq 25\text{kg/m}^2$  ( $p = 0.025$ ), diabetes mellitus ( $p = 0.022$ ),

**Table 1. Characteristics of patients with acute myocardial infarction and their controls.**

|                                          | Cases (n = 187)<br>No. (%) | Controls (n = 187)<br>No. (%) | P       |
|------------------------------------------|----------------------------|-------------------------------|---------|
| Age (≤ 65 years)                         | 102 (54.5)                 | 96 (51.3)                     | matched |
| Gender (Male)                            | 113 (60.4)                 | 113 (60.4)                    | matched |
| Place of residence (Urban)               | 136 (72.7)                 | 136 (72.7)                    | matched |
| Occupation*                              |                            |                               |         |
| Housewife                                | 30 (16.0)                  | 30 (16.0)                     |         |
| - Manual worker                          | 95 (50.8)                  | 96 (51.3)                     |         |
| - Farmer                                 | 16 (8.6)                   | 19 (10.2)                     |         |
| - Clerk                                  | 29 (15.5)                  | 23 (12.3)                     |         |
| - Professional                           | 17 (9.1)                   | 19 (10.2)                     | 0.956   |
| Educational level (≤ 8 years)            | 74 (39.6)                  | 76 (40.6)                     | 0.916   |
| Marital status (with partner)            | 137 (73.3)                 | 133 (71.1)                    | 0.729   |
| Body mass index (≥ 25kg/m <sup>2</sup> ) | 126 (67.4)                 | 107 (57.2)                    | 0.043   |
| Oral contraceptive use                   | 4 (5.6)                    | 7 (9.2)                       | 0.535   |
| Diabetes mellitus                        | 39 (20.9)                  | 13 (7.0)                      | <0.001  |
| Hypertension                             | 107 (57.2)                 | 77 (41.2)                     | 0.003   |
| Hypercholesterolemia                     | 40 (21.4)                  | 10 (5.3)                      | <0.001  |
| Disorders of thyroidea                   | 13 (7.0)                   | 5 (2.7)                       | 0.088   |
| Stressful events                         | 149 (79.7)                 | 116 (62.0)                    | <0.001  |
| Family history of myocardial infarction  | 109 (58.3)                 | 78 (41.7)                     | 0.002   |
| Smoking                                  | 119 (63.6)                 | 96 (51.3)                     | 0.021   |
| Coffee consumption                       | 165 (88.2)                 | 170 (90.9)                    | 0.499   |

P, probability value (according to univariate logistic regression analysis).

\* For retiree the occupation before retirement was shown.

<https://doi.org/10.1371/journal.pone.0198129.t001>

hypertension ( $p = 0.002$ ), hypercholesterolemia ( $p = 0.002$ ), stressful events ( $p = 0.027$ ), and family history of myocardial infarction ( $p = 0.045$ ) (Table 2). Among participants who had never consumed alcohol, a higher proportion of cases than controls had diabetes mellitus ( $p = 0.001$ ), hypercholesterolemia ( $p = 0.001$ ), stressful events ( $p = 0.001$ ), family history of myocardial infarction ( $p = 0.011$ ), and smoking ( $p = 0.041$ ).

### Alcohol consumption and myocardial infarction

The history of alcohol consumption in patients with acute myocardial infarction and their controls was not significantly different: the percentage of those that were not consuming alcohol was slightly higher in controls (49.7%) than in cases (45.5%) (Table 3). Our study found that 24.6% of cases and 20.3% of controls first started drinking alcohol before the age of 20 years, and that average duration of consumption for both groups was 30 years or more. All of the patients who regularly used alcohol consumed more than one type of drink. Of all alcoholic beverages, the most commonly used were spirits (especially rakija, a fruit brandy that normally has 40% alcohol content, but home-produced can be typically 50% to 80%, even going as high as 90%) both in cases (44.4%) and controls (42.2%). But, the risk of myocardial infarction associated with types of alcoholic beverages was similar among patients who reported drinking beer, wine, spirits, or mixed beverages. Although average amount of beer (> 1 bottle) consumed per day was more common in cases than in controls, these differences were not statistically significant. Compared to non-drinkers, cases and controls did not differ significantly in the use of certain types of alcoholic beverages. The intensity of alcohol consumption (the total

Table 2. Characteristics of patients with acute myocardial infarction and their controls, according to alcohol use.

|                                          | Alcohol use                |                              |       |                           |                              |       |
|------------------------------------------|----------------------------|------------------------------|-------|---------------------------|------------------------------|-------|
|                                          | Ever (n = 196)             |                              |       | Never (n = 178)           |                              |       |
|                                          | Cases (n = 102)<br>No. (%) | Controls (n = 94)<br>No. (%) | P     | Cases (n = 85)<br>No. (%) | Controls (n = 93)<br>No. (%) | P     |
| Age (≤ 65 years)                         | 60 (58.8)                  | 58 (61.7)                    | 0.770 | 42 (49.4)                 | 38 (40.9)                    | 0.292 |
| Gender (Male)                            | 89 (87.3)                  | 79 (84.0)                    | 0.546 | 24 (28.2)                 | 34 (36.6)                    | 0.265 |
| Place of residence (Urban)               | 70 (68.6)                  | 70 (74.5)                    | 0.429 | 66 (77.6)                 | 66 (71.0)                    | 0.392 |
| Occupation*                              |                            |                              |       |                           |                              |       |
| - Housewife                              | 4 (3.9)                    | 6 (6.4)                      |       | 26 (30.6)                 | 24 (25.8)                    |       |
| - Manual worker                          | 61 (59.8)                  | 57 (60.6)                    |       | 34 (40.0)                 | 39 (41.9)                    |       |
| - Farmer                                 | 8 (7.8)                    | 8 (6.4)                      |       | 8 (9.4)                   | 13 (14.0)                    |       |
| - Clerk                                  | 16 (15.7)                  | 13 (13.8)                    |       | 13 (15.3)                 | 10 (10.8)                    |       |
| - Professional                           | 13 (12.7)                  | 12 (12.8)                    | 0.599 | 4 (4.7)                   | 7 (7.5)                      | 0.497 |
| Educational level (≤ 8 years)            | 25 (24.5)                  | 30 (31.9)                    | 0.269 | 49 (57.6)                 | 46 (49.5)                    | 0.295 |
| Marital status (with partner)            | 83 (81.4)                  | 71 (75.5)                    | 0.384 | 54 (63.5)                 | 62 (66.7)                    | 0.753 |
| Body mass index (≥ 25kg/m <sup>2</sup> ) | 79 (77.5)                  | 59 (62.8)                    | 0.025 | 47 (55.3)                 | 48 (51.6)                    | 0.624 |
| Oral contraceptive use                   | 0 (0.0)                    | 3 (18.8)                     | 0.119 | 4 (6.7)                   | 4 (6.7)                      | 1.000 |
| Diabetes mellitus                        | 17 (16.7)                  | 6 (6.4)                      | 0.022 | 22 (25.9)                 | 7 (7.5)                      | 0.001 |
| Hypertension                             | 53 (52.0)                  | 28 (29.8)                    | 0.002 | 54 (63.5)                 | 49 (52.7)                    | 0.145 |
| Hypercholesterolemia                     | 24 (23.5)                  | 7 (7.4)                      | 0.002 | 16 (18.8)                 | 3 (3.2)                      | 0.001 |
| Disorders of thyroidea                   | 4 (3.9)                    | 1 (1.1)                      | 0.206 | 9 (10.6)                  | 4 (4.3)                      | 0.108 |
| Stressful events                         | 75 (73.5)                  | 55 (58.5)                    | 0.027 | 74 (87.1)                 | 61 (65.6)                    | 0.001 |
| Family history of myocardial infarction  | 57 (55.9)                  | 39 (41.5)                    | 0.045 | 52 (61.2)                 | 39 (41.9)                    | 0.011 |
| Smoking                                  | 74 (72.5)                  | 61 (64.9)                    | 0.249 | 45 (52.9)                 | 35 (37.6)                    | 0.041 |
| Coffee consumption                       | 93 (91.2)                  | 85 (90.4)                    | 0.856 | 72 (84.7)                 | 85 (91.4)                    | 0.168 |

P, probability value (according to univariate logistic regression analysis).

\* For retiree the occupation before retirement was shown

<https://doi.org/10.1371/journal.pone.0198129.t002>

amount of pure alcohol consumed per day) was higher in cases than in controls, but without statistical significance. The habit of drinking at least one drink every day was reported by 14.4% of cases and 11.8% of controls. Compared to non-drinkers, the habit of binge drinking on one occasion at least once a month during the last year preceding the onset of the myocardial infarction for cases and the current illness for controls was significantly more common in cases (25.1%) than in controls (12.8%): adjusted OR = 2.2 (95%CI = 1.2–4.2, *p* = 0.017), *p* for trend = 0.015. No significant differences were observed in the risk of acute myocardial infarction by the history of cessation of alcohol consumption and duration of abstinence.

Analysis of binge drinking by age, gender and place of residence revealed that the increase of risk for acute myocardial infarction was associated with older age (adjusted OR = 5.1, 95% CI = 1.7–15.1, *p* for trend = 0.010), male gender (adjusted OR = 2.3, 95%CI = 1.1–5.2, *p* for trend = 0.028) and rural place of residence (adjusted OR = 4.8, 95%CI = 1.3–18.5, *p* for trend = 0.033) (Table 4).

## Discussion

Our study showed that binge drinking is significantly associated with the increased risk for acute myocardial infarction, especially in older people, males and those living in the countryside.



Table 3. Characteristics of study participants according to drinking pattern.

| Alcohol consumption history                                 | Cases (n = 187)<br>No. (%) | Controls (n = 187)<br>No. (%) | OR (95%CI)<br>Unadjusted | P             | OR (95%CI)<br>Adjusted* | P     |
|-------------------------------------------------------------|----------------------------|-------------------------------|--------------------------|---------------|-------------------------|-------|
| <b>Alcohol consumption (Yes)</b>                            | 102 (54.5)                 | 94 (50.3)                     | 1.2 (0.8–1.8)            | 0.408         | 1.2 (0.7–1.9)           | 0.488 |
| <b>Time of the beginning of consumption (&lt; 20 years)</b> | 46 (24.6)                  | 38 (20.3)                     | 1.3 (0.8–2.2)            | 0.290         | 1.2 (0.6–2.1)           | 0.616 |
| <b>Duration of consumption (≥ 30 years)</b>                 | 66 (35.3)                  | 61 (32.6)                     | 1.2 (0.8–1.9)            | 0.468         | 1.2 (0.7–2.0)           | 0.517 |
| <b>Alcoholic beverages types</b>                            |                            |                               |                          |               |                         |       |
| Non-drinkers                                                | 85 (45.5)                  | 93 (49.7)                     | 1.0 <sup>†</sup>         |               | 1.0 <sup>†</sup>        |       |
| Beer                                                        | 53 (28.3)                  | 39 (20.9)                     | 1.5 (0.9–2.5)            | 0.125         | 1.5 (0.8–2.6)           | 0.191 |
| Wine                                                        | 50 (26.7)                  | 38 (20.3)                     | 1.4 (0.9–2.4)            | 0.165         | 1.4 (0.8–2.5)           | 0.273 |
| Spirits                                                     | 83 (44.4)                  | 79 (42.2)                     | 1.2 (0.8–1.8)            | 0.521         | 1.2 (0.7–1.9)           | 0.566 |
| Mixed                                                       | 102 (54.5)                 | 94 (50.3)                     | 1.2 (0.8–1.8)            | 0.408         | 1.2 (0.7–1.9)           | 0.488 |
| <b>Average amount of beverages per day</b>                  |                            |                               |                          |               |                         |       |
| Non-drinkers                                                | 85 (45.5)                  | 93 (49.7)                     | 1.0 <sup>†</sup>         |               | 1.0 <sup>†</sup>        |       |
| Beer (> 1 bottle / day)                                     | 12 (6.4)                   | 5 (2.7)                       | 2.6 (0.9–7.8)            | 0.081         | 2.7 (0.8–8.6)           | 0.094 |
| Wine (> 1 glass / day)                                      | 9 (4.8)                    | 4 (2.1)                       | 2.5 (0.7–8.3)            | 0.146         | 1.6 (0.4–6.3)           | 0.510 |
| Spirits (> 1 shot / day)                                    | 20 (10.7)                  | 16 (8.6)                      | 1.4 (0.7–2.8)            | 0.394         | 1.4 (0.6–3.0)           | 0.429 |
| <b>The total amount of pure<sup>‡</sup> alcohol (g/day)</b> |                            |                               |                          |               |                         |       |
| Non-drinkers                                                | 85 (45.5)                  | 93 (49.7)                     | 1.0 <sup>†</sup>         |               | 1.0 <sup>†</sup>        |       |
| ≤ 13                                                        | 55 (29.4)                  | 59 (31.6)                     | 1.0 (0.6–1.6)            | 0.934         | 2.0 (0.6–1.8)           | 0.931 |
| > 13                                                        | 47 (25.1)                  | 35 (18.7)                     | 1.5 (0.9–2.5)            | 0.153         | 1.4 (0.8–2.6)           | 0.231 |
| <i>P</i> <sub>trend</sub>                                   |                            |                               |                          | 0.326         |                         | 0.443 |
| <b>Regular consumers (daily) in the last year</b>           |                            |                               |                          |               |                         |       |
| Non-drinkers                                                | 85 (45.5)                  | 93 (49.7)                     | 1.0 <sup>†</sup>         |               | 1.0 <sup>†</sup>        |       |
| Irregular                                                   | 75 (40.1)                  | 72 (38.5)                     | 1.1 (0.7–1.8)            | 0.558         | 1.1 (0.6–1.8)           | 0.776 |
| Regular (daily)                                             | 27 (14.4)                  | 22 (11.8)                     | 1.3 (0.7–2.5)            | 0.363         | 1.5 (0.8–3.1)           | 0.226 |
| <i>P</i> <sub>trend</sub>                                   |                            |                               |                          | 0.628         |                         | 0.473 |
| <b>Binge drinking<sup>  </sup></b>                          |                            |                               |                          |               |                         |       |
| Non-drinkers                                                | 85 (45.2)                  | 93 (49.7)                     | 1.0 <sup>†</sup>         |               | 1.0 <sup>†</sup>        |       |
| No binge drinking                                           | 55 (29.4)                  | 70 (37.4)                     | 0.9 (0.5–1.4)            | 0.519         | 0.9 (0.5–1.4)           | 0.548 |
| Binge drinking                                              | 47 (25.1)                  | 24 (12.8)                     | 2.1 (1.2–3.8)            | 0.009         | 2.2 (1.2–4.2)           | 0.017 |
| <i>P</i> <sub>trend</sub>                                   |                            |                               |                          | 0.009         |                         | 0.015 |
| <b>Cessation of consumption (No)</b>                        |                            |                               |                          |               |                         |       |
| 82 (43.9)                                                   | 76 (40.6)                  | 1.2 (0.8–1.8)                 | 0.448                    | 1.2 (0.8–2.1) | 0.397                   |       |
| <b>Duration of abstinence (≤10 years)</b>                   | 12 (6.4)                   | 7 (3.7)                       | 1.9 (0.7–5.0)            | 0.207         | 1.6 (0.5–4.9)           | 0.398 |

Abbreviations: OR, Odds Ratio; CI, Confidence Interval; P, Probability value (according to logistic regression analysis); *P*<sub>trend</sub>, trend in risk (according to logistic regression model).

\* Adjusted for body mass index, positive personal medical history for diabetes mellitus, hypertension, hypercholesterolemia, and disorders of thyroidea, family history of myocardial infarction, stressful events, and tobacco use

<sup>†</sup> Reference category

<sup>‡</sup> A standard drink is defined as 13 g alcohol

<sup>||</sup> Binge drinking was defined as the consumption of 5+ standard drinks for men and 4+ standard drinks for women on one occasion at least once a month during the last year preceding the onset of the myocardial infarction for cases and the current illness for controls.

<https://doi.org/10.1371/journal.pone.0198129.t003>

Until today, a few investigators have specifically examined the influence of binge drinking on myocardial infarction occurrence. Our results (for binge drinking: OR = 2.2, 95%CI = 1.2–4.2) were consistent with some previous studies [27–31] that showed that binge drinking was associated with an increased risk of acute myocardial infarction. Also, a nationwide representative cohort of 50,000 Swedish male conscripts of 18–20 years of age indicated, through a 1969–2004 follow-up, that binge drinking and high alcohol consumption significantly

**Table 4. Estimated risk\* † - odds ratio (95% confidence intervals) of acute myocardial infarction in relation to binge drinking in separate strata of selected covariates.**

| Covariates                | Binge drinking*            |                   |                | P <sub>trend</sub> |
|---------------------------|----------------------------|-------------------|----------------|--------------------|
|                           | Non-drinkers <sup>  </sup> | No binge drinking | Binge drinking |                    |
| <b>Age (years)</b>        |                            |                   |                |                    |
| ≤ 65                      | 1.0                        | 0.5 (0.2–1.2)     | 0.9 (0.4–2.2)  | 0.111              |
| > 65                      | 1.0                        | 1.1 (0.5–2.3)     | 5.1 (1.7–15.1) | 0.010              |
| <b>Gender</b>             |                            |                   |                |                    |
| Male                      | 1.0                        | 0.9 (0.4–2.0)     | 2.3 (1.1–5.2)  | 0.028              |
| Female                    | 1.0                        | 0.9 (0.4–2.4)     | —              |                    |
| <b>Place of residence</b> |                            |                   |                |                    |
| Rural                     | 1.0                        | 0.9 (0.3–2.7)     | 4.8 (1.3–18.5) | 0.033              |
| Urban                     | 1.0                        | 0.8 (0.4–1.5)     | 1.3 (0.6–2.8)  | 0.486              |

Abbreviation: P<sub>trend</sub>, trend in risk (according to logistic regression model).

\* According to multivariate logistic regression analysis

† Adjusted for body mass index, positive personal medical history for diabetes mellitus, hypertension, hypercholesterolemia, and disorders of thyroidea, family history of myocardial infarction, stressful events, and tobacco use

\* Binge drinking was defined as the consumption of 5+ standard drinks for men and 4+ standard drinks for women on one occasion at least once a month during the last year preceding the onset of the myocardial infarction for cases and the current illness for controls

<sup>||</sup> Reference category.

<https://doi.org/10.1371/journal.pone.0198129.t004>

increased the risk of total myocardial infarction (1.71, 95%CI = 1.24–2.35), but non-significantly increased the risk for fatal myocardial infarction (2.23, 95%CI = 0.81–6.53) [35]. Nevertheless, some epidemiological studies have found that heavy alcohol consumption was associated with a decreased risk of coronary heart disease [36,37]. During an average follow up of 4.36 years, Chinese men aged 45–81 years, who consumed >40 grams of ethanol per time with ≥5 times per week, had a significantly decreased risk of coronary heart disease (HR = 0.73, 95%CI = 0.54–1.00) compared with non-drinkers [37]. Contrary to that, a case-crossover study of 250 incident acute myocardial infarction cases in Switzerland found no evidence that the effect of binge drinking was significant [38]. Also, a recent a case-crossover study in Iran showed that alcohol abuse was not an acute trigger associated with significantly increased risk of myocardial infarction [39]. Possible explanations for the differences in results of these studies could include differences both in the characteristics of respondents (in terms of age, gender, occupation, comorbidity) and in the study design (in terms of the differences in selection of the cases with myocardial infarction and their controls, choice of the reference category for assessment of alcohol consumption, etc).

Drinking of alcoholic beverages in Serbia is considered a socially acceptable behavior [40]. The high prevalence of alcohol use (especially spirits) in our study is, inter alia, a consequence of considering alcohol use a part of tradition, customs and culture. Also, 16% of the general population in Serbia practiced excessive drinking per occasion (binge drinking) at least once per month [40]. In our case-control study, binge drinking was reported by 25.1% of cases and 12.8% of controls, which is, according to the available literature data, a larger percentage than in most of the countries in the region [41,42]. In the United States of America, the overall prevalence of binge drinking among adults aged ≥18 years was 17.1% in 2010 [43]. Potential mechanisms for a detrimental effect of binge drinking on acute myocardial infarction risk include increased fluctuations in blood pressure (either an acute increase or sustained hypertension after cessation of drinking) [44,45], together with heightened platelet activation and adverse changes in the balance of fibrinolytic factors, ventricular arrhythmia [46], direct damage to

heart muscle cells (alcoholic cardiomyopathy) [47], as well as the unfavorable effects on lipid profile reported in some studies (such as increase of low-density lipoprotein levels, and no increase in high-density lipoprotein levels) [48], although the evidence is inconsistent [49].

The relationship between binge drinking and risk of acute myocardial infarction seems to be associated with older age, male gender and with life in the countryside in our study. Similarly, the “INTERHEART” study recorded that binge drinking related to myocardial infarction, especially in older people in developed countries [26]. Information about potential mechanisms linking diverse patterns of drinking to diverse risk of myocardial infarction by age, gender and place of residence is limited. Heavy episodic drinking is frequently reported by elderly, male and those with lower levels of education, who may be particularly at risk because of age-related increases in comorbidities and medication use [50,51]. Additionally, women had, on average, a very low level of alcohol consumption and there were only small differences in incidence of myocardial infarction between drinkers and non-drinkers [29].

The findings of numerous epidemiological studies that indicated a protective effect of moderate alcohol consumption on the occurrence of myocardial infarction were not confirmed in our study. Tavani et al [18] noted that the consumption of alcoholic drinks was inversely related to non-fatal myocardial infarction, irrespective of the type of drink, and depended on the duration of alcohol consumption. People who consumed alcohol for 40 years or more had a 60% lower risk of developing the disease, and those who regularly consumed alcoholic beverages, one to three glasses a day, had a two times lower risk of myocardial infarction [18]. Schröder et al [15] observed that consumption of up to 30 g of alcohol per day was inversely related to the onset of non-fatal myocardial infarction after controlling for potential confounding factors. Alcohol consumption of up to 20 g / day including wine, beer and brandy, significantly reduced the risk of myocardial infarction, while higher alcohol intake did not substantially reduce the risk [15]. Two nested case-control studies in the United States, which included women enrolled in the Nurses Health Study and men enrolled in the Health Professionals Follow-Up Study, found that the frequency of alcohol consumption was significantly associated with a reduced risk of acute myocardial infarction [52]. The lowest risk was recorded in people who consumed alcohol most frequently (3–7 drinks per week) and those who consumed the highest quantities (30g / day and more). Similar results were observed in studies in Spain, Costa Rica, France and Northern Ireland [53–55]. A large meta-analysis which included 240 studies showed that a daily intake of alcohol in the amount of 50 g / day had a protective effect for myocardial infarction (RR = 0.87, 95% CI = 0.54–0.90), while intake of 100 g / day was associated with an increased risk (RR = 1.13; 95% CI = 1.06–1.21) [56]. This meta-analysis found that the daily intake of 72 g/day was the limit in amount of consumed alcohol for which significant protective effect was still recorded, while the amount of 89 g / day was the value from which a significantly increased risk began [56].

The relationship between alcohol consumption and myocardial infarction remains controversial. Differences between the results obtained in some studies can partly be explained with different methodology that was used, but also with differences in the characteristics of study groups (some studies are limited to specific groups of subjects such as employed patients or patients after rehabilitation, or focused on older patients, while other focus on younger and healthier patients). Although our case-control study was hospital-based, data in available literature show that the frequency of alcohol consumption found in our respondents was similar to the pattern of alcohol consumption across the entire population [40,41]. A possible reason for the absence of substantial differences is the fact that comorbidity was not a reason for exclusion from the study (among the controls there were probably illnesses associated with alcohol consumption, e.g. trauma). Also, in our study among those who used alcohol there were significantly more persons with obesity and hypertension among cases than among controls, while

those differences were not significant in non-drinkers. In addition, our study did not include the most severe patients with myocardial infarction, as they died shortly after admission to the hospital, so there was no alcohol consumption data available. Future epidemiological analytical studies are needed to clarify the impact of not only pure ethanol but also non-alcoholic ingredients in alcoholic beverages on the occurrence of myocardial infarction.

### Limitations of the study

Our study has several strengths. Firstly, this study presented detailed qualitative and quantitative data on alcohol consumption over a period of 10 years before the onset of the disease. Secondly, based on the intake of certain types of beverages, we estimated the average daily intake of pure alcohol in our study. In addition, the former drinkers (regardless of the duration of abstinence) were excluded from the reference group which might have minimized bias to some extent. But, our study has some limitations. The limitation of this study might be that the definitions of alcohol consumption (such as differences in the definition of alcohol use, categories of the frequency and intensity of alcohol consumption, as well as the differences in the quality of alcoholic beverages or "standard" drink) somewhat differed from the definitions that were used in some other studies, so the comparison of findings was sometimes difficult [25]. The response rate of 100%, as well as the fact that the interview was always conducted by a medical doctor, could partly reduce the shortcomings of our case-control study. Also, although we estimate that the underreporting of alcohol consumption in this study was not a problem, because drinking in Serbia is a traditionally accepted habit, we cannot preclude the possible existence of recall bias when doing a retrospective study of alcohol use and myocardial infarction. The limitation of the study is the lack of information on the consumption of alcohol in periods of high sensitivity (such as puberty, pregnancy, lactation). In addition to the well-known shortcomings of case control studies, a further limitation of the study was the relatively small sample size. We acknowledge that failure in both determining previous use of medications among cases and controls and compliance to a recommended treatment might have led to a less accurate assessment of risk for myocardial infarction, but in this study there was no suitable data for this. As in many other studies, our list of potential confounders was not complete and we cannot exclude the possibility that some unmeasured confounders (such as dietary factors, socio-economic status) might explain the results of this study.

### Conclusions

Our study is one of the few in which binge drinking was found to be a risk factor for acute myocardial infarction. Binge drinking is frequent among older aged, men and those living in the countryside, and needs to be addressed in understanding the health risks. But, this study confirms that the relationship between alcohol consumption and myocardial infarction is quite complex and further analytical epidemiological studies are needed to clarify the observed association.

### Supporting information

**S1 File. Question—in Serbian.**  
(DOC)

**S2 File. Question—in English.**  
(DOC)

## Author Contributions

**Conceptualization:** Milena Ilic, Irena Ilic.

**Data curation:** Milena Ilic, Irena Ilic.

**Formal analysis:** Milena Ilic, Irena Ilic.

**Funding acquisition:** Milena Ilic, Irena Ilic.

**Investigation:** Milena Ilic, Irena Ilic.

**Methodology:** Milena Ilic, Irena Ilic.

**Project administration:** Milena Ilic, Irena Ilic.

**Resources:** Milena Ilic, Irena Ilic.

**Software:** Milena Ilic, Irena Ilic.

**Supervision:** Milena Ilic, Sandra Grujicic Sipetic, Branko Ristic, Irena Ilic.

**Validation:** Milena Ilic, Irena Ilic.

**Visualization:** Milena Ilic, Irena Ilic.

**Writing – original draft:** Milena Ilic, Irena Ilic.

**Writing – review & editing:** Milena Ilic, Sandra Grujicic Sipetic, Branko Ristic, Irena Ilic.

## References

1. World Health Organization. The WHO Mortality Database. Geneva: WHO, 2015.
2. Thygesen K, Alpert JS, White HD; Joint ESC/ACCF/AHA/WHF Task Force for the Redefinition of Myocardial Infarction. Universal definition of myocardial infarction. *Eur Heart J.* 2007; 28:2525–38. <https://doi.org/10.1093/eurheartj/ehm355> PMID: 17951287
3. WHO Regional Office for Europe. Cardiovascular diseases. Copenhagen: WHO, 2015.
4. Statistical Office of the Republic of Serbia. Demographic yearbook in the Republic of Serbia, 1991–2014. Belgrade: Statistical Office of the Republic of Serbia, 2015.
5. Institute of Public Health of Serbia. INCIDENCE AND MORTALITY OF ACUTE CORONARY SYNDROME IN SERBIA. Belgrade: Institute of Public Health of Serbia, 2015.
6. World Health Organization. Global atlas on cardiovascular disease prevention and control. Geneva: WHO, 2011.
7. Mahmood SS, Levy D, Vasan RS, Wang TJ. The Framingham Heart Study and the epidemiology of cardiovascular disease: a historical perspective. *Lancet.* 2014; 383:999–1008. [https://doi.org/10.1016/S0140-6736\(13\)61752-3](https://doi.org/10.1016/S0140-6736(13)61752-3) PMID: 24084292
8. Anand SS, Islam S, Rosengren A, Steyn K, Yusufali AH, et al; INTERHEART Investigators. Risk factors for myocardial infarction in women and men: insights from the INTERHEART study. *Eur Heart J.* 2008; 29:932–40. <https://doi.org/10.1093/eurheartj/ehn018> PMID: 18334475
9. Wilkins JT, Ning H, Berry J, Zhao L, Dyer AR, Lloyd-Jones DM. Lifetime risk and years lived free of total cardiovascular disease. *JAMA.* 2012; 308:1795–801. <https://doi.org/10.1001/jama.2012.14312> PMID: 23117780
10. McGorrian C, Yusuf S, Islam S, Jung H, Rangarajan S, Avezum A, et al; INTERHEART Investigators. Estimating modifiable coronary heart disease risk in multiple regions of the world: the INTERHEART Modifiable Risk Score. *Eur Heart J.* 2011; 32:581–9. <https://doi.org/10.1093/eurheartj/ehq448> PMID: 21177699
11. Ilomäki J, Hajat A, Kauhanen J, Kurl S, Kaufman JS, Tuomainen TP et al. Relationship between alcohol consumption and myocardial infarction among ageing men using a marginal structural model. *Eur J Public Health.* 2012; 22:825–30. <https://doi.org/10.1093/eurpub/ckr013> PMID: 21398379
12. Yusuf S, Hawken S, Ounpuu S, Dans T, Avezum A, Lanas F et al; INTERHEART Study Investigators. Effect of potentially modifiable risk factors associated with myocardial infarction in 52 countries (the INTERHEART study): case-control study. *Lancet.* 2004; 364:937–52. [https://doi.org/10.1016/S0140-6736\(04\)17018-9](https://doi.org/10.1016/S0140-6736(04)17018-9) PMID: 15364185

13. Zhang XY, Shu L, Si CJ, Yu XL, Liao D, Gao W et al. Dietary Patterns, Alcohol Consumption and Risk of Coronary Heart Disease in Adults: A Meta-Analysis. *Nutrients*. 2015; 7:6582–605. <https://doi.org/10.3390/nu7085300> PMID: 26262641
14. Ronksley PE, Brien SE, Turner BJ, Mukamal KJ, Ghali WA. Association of alcohol consumption with selected cardiovascular disease outcomes: a systematic review and meta-analysis. *BMJ*. 2011; 342: d671. <https://doi.org/10.1136/bmj.d671> PMID: 21343207
15. Schröder H, Masabeu A, Marti MJ, Cols M, Lisbona JM, Romagosa C et al; REGICOR investigators. Myocardial infarction and alcohol consumption: a population-based case-control study. *Nutr Metab Cardiovasc Dis*. 2007; 17:609–15. <https://doi.org/10.1016/j.numecd.2006.04.010> PMID: 17074471
16. Smyth A, Teo KK, Rangarajan S, O'Donnell M, Zhang X, Rana P et al. Alcohol consumption and cardiovascular disease, cancer, injury, admission to hospital, and mortality: a prospective cohort study. *Lancet*. 2015; 386:1945–54. [https://doi.org/10.1016/S0140-6736\(15\)00235-4](https://doi.org/10.1016/S0140-6736(15)00235-4) PMID: 26386538
17. King DE, Mainous AG 3rd, Geesey ME. Adopting moderate alcohol consumption in middle age: subsequent cardiovascular events. *Am J Med*. 2008; 121:201–6. <https://doi.org/10.1016/j.amjmed.2007.12.004> PMID: 18328303
18. Tavani A, Bertuzzi M, Negri E, Sorbara L, La Vecchia C. Alcohol, smoking, coffee and risk of non-fatal acute myocardial infarction in Italy. *Eur J Epidemiol*. 2001; 17:1131–7. PMID: 12530773
19. Bazzano LA, Gu D, Reynolds K, Chen J, Wu X, Chen CS et al. Alcohol consumption and risk of coronary heart disease among Chinese men. *Int J Cardiol*. 2009; 135:78–85. <https://doi.org/10.1016/j.ijcard.2008.03.038> PMID: 18614248
20. World Health Organization. Global status report on alcohol and health. Geneva: WHO, 2014.
21. Ruidavets JB, Ducimetière P, Evans A, Montaye M, Haas B, Bingham A et al. Patterns of alcohol consumption and ischaemic heart disease in culturally divergent countries: the Prospective Epidemiological Study of Myocardial Infarction (PRIME). *BMJ*. 2010; 341:c6077. <https://doi.org/10.1136/bmj.c6077> PMID: 21098615
22. Mostofsky E, van der Bom JG, Mukamal KJ, Maclure M, Tofler GH, Muller JE et al. Risk of myocardial infarction immediately after alcohol consumption. *Epidemiology*. 2015; 26:143–50. <https://doi.org/10.1097/EDE.0000000000000227> PMID: 25563434
23. Roerecke M & Rehm J. Alcohol consumption, drinking patterns, and ischemic heart disease: a narrative review of meta-analyses and a systematic review and meta-analysis of the impact of heavy drinking occasions on risk for moderate drinkers. *BMC Med*. 2014; 12:182. <https://doi.org/10.1186/s12916-014-0182-6> PMID: 25567363
24. Roerecke M & Rehm J. Irregular heavy drinking occasions and risk of ischemic heart disease: a systematic review and meta-analysis. *Am J Epidemiol*. 2010; 171:633–44. <https://doi.org/10.1093/aje/kwp451> PMID: 20142394
25. Holmes MV, Dale CE, Zuccolo L, Silverwood RJ, Guo Y, Ye Z et al. Association between alcohol and cardiovascular disease: Mendelian randomisation analysis based on individual participant data. *BMJ*. 2014; 349:g4164. <https://doi.org/10.1136/bmj.g4164> PMID: 25011450
26. Leong DP, Smyth A, Teo KK, McKee M, Rangarajan S, Pais P et al; INTERHEART Investigators. Patterns of alcohol consumption and myocardial infarction risk: observations from 52 countries in the INTERHEART case-control study. *Circulation*. 2014; 130:390–8. <https://doi.org/10.1161/CIRCULATIONAHA.113.007627> PMID: 24928682
27. McElduff P, Dobson AJ. How much alcohol and how often? Population based case-control study of alcohol consumption and risk of a major coronary event. *BMJ*. 1997; 314:1159–64. PMID: 9146388
28. Dorn JM, Hovey K, Williams BA, Freudenheim JL, Russell M, Nochajski TH et al. Alcohol drinking pattern and non-fatal myocardial infarction in women. *Addiction*. 2007; 102:730–9. <https://doi.org/10.1111/j.1360-0443.2007.01765.x> PMID: 17506150
29. Hammar N, Romelsjö A, Alfredsson L. Alcohol consumption, drinking pattern and acute myocardial infarction. A case referent study based on the Swedish Twin Register. *J Intern Med*. 1997; 241:125–31. PMID: 9077369
30. Kauhanen J, Kaplan GA, Goldberg DE, Salonen JT. Beer bingeing and mortality: results from the Kuopio ischaemic heart disease risk factor study, a prospective population based study. *BMJ*. 1997; 315:846–51. PMID: 9353504
31. Roerecke M, Greenfield TK, Kerr WC, Bondy S, Cohen J, Rehm J. Heavy drinking occasions in relation to ischaemic heart disease mortality—an 11–22 year follow-up of the 1984 and 1995 US National Alcohol Surveys. *Int J Epidemiol*. 2011; 40:1401–10. <https://doi.org/10.1093/ije/dyr129> PMID: 22039198
32. World Health Organization. European Health for All Database (HFA-DB). Copenhagen: WHO Regional Office for Europe; 2015.

33. World Health Organization. Obesity: preventing and managing the global epidemic: report of a WHO consultation. Geneva: WHO, 2000.
34. Mladenovic I. Responsible Drinking Guidelines. Belgrade: Institute for Mental Health, 2014.
35. Romelsjö A, Allebeck P, Andréasson S, Leifman A. Alcohol, mortality and cardiovascular events in a 35 year follow-up of a nationwide representative cohort of 50,000 Swedish conscripts up to age 55. *Alcohol Alcohol*. 2012; 47:322–7. <https://doi.org/10.1093/alcalc/ags021> PMID: 22387338
36. Mukamal KJ, Chen CM, Rao SR, Breslow RA. Alcohol consumption and cardiovascular mortality among U.S. adults, 1987 to 2002. *J Am Coll Cardiol*. 2010; 55:1328–35. <https://doi.org/10.1016/j.jacc.2009.10.056> PMID: 20338493
37. Zhang Y, Yu Y, Yuan Y, Yu K, Yang H, Li X et al. T. Association of drinking pattern with risk of coronary heart disease incidence in the middle-aged and older Chinese men: Results from the Dongfeng-Tongji cohort. *PLoS One*. 2017; 12:e0178070. <https://doi.org/10.1371/journal.pone.0178070> PMID: 28542413
38. Gerlich MG, Krämer A, Gmel G, Maggiorini M, Lüscher TF, Rickli H et al. Patterns of alcohol consumption and acute myocardial infarction: a case-crossover analysis. *Eur Addict Res*. 2009; 15(3):143–9. <https://doi.org/10.1159/000213641> PMID: 19390198
39. Ghiasmand M, Moghadamnia MT, Pourshaikhian M, Kazemnejad Lili E. Acute triggers of myocardial infarction: A case-crossover study. *Egypt Heart J*. 2017; 69(4):223–8. <https://doi.org/10.1016/j.ehj.2017.03.003> PMID: 29622981
40. Ministry of Health, Republic of Serbia. National Health survey, Serbia 2013. Belgrade: Ministry of Health, Republic of Serbia, 2014.
41. Gmel G, Rehm J, Kuntsche E. Binge drinking in Europe: definitions, epidemiology, and consequences. *Sucht* 2003; 49:105–16.
42. Dawson DA, Goldstein RB, Saha TD, Grant BF. Changes in alcohol consumption: United States, 2001–2002 to 2012–2013. *Drug Alcohol Depend*. 2015; 148:56–61. <https://doi.org/10.1016/j.drugalcdep.2014.12.016> PMID: 25620731
43. Centers for Disease Control and Prevention. Vital signs: binge drinking prevalence, frequency, and intensity among adults—United States, 2010. *Morb Mortal Wkly Rep*. 2012; 61(1):14–9.
44. Klatsky AL, Koplik S, Gunderson E, Kipp H, Friedman GD. Sequelae of systemic hypertension in alcohol abstainers, light drinkers, and heavy drinkers. *Am J Cardiol*. 2006; 98:1063–8. <https://doi.org/10.1016/j.amjcard.2006.05.029> PMID: 17027572
45. Puddey IB, Rakic V, Dimmitt SB, Beilin JL. Influence of pattern of drinking on cardiovascular disease and cardiovascular risk factors—a review. *Addiction*. 1999; 94:649–63. PMID: 10563030
46. Pajak A, Szafraniec K, Kubinova R, Malyutina S, Peasey A, Pikhart H et al. Binge drinking and blood pressure: cross-sectional results of the HAPIEE study. *PLoS One*. 2013; 8:e65856. <https://doi.org/10.1371/journal.pone.0065856> PMID: 23762441
47. Urbano-Marquez A, Estruch R, Navarro-Lopez F, Grau JM, Mont L, Rubin E. The effects of alcoholism on skeletal and cardiac muscle. *N Engl J Med*. 1989; 320:409–15. <https://doi.org/10.1056/NEJM198902163200701> PMID: 2913506
48. Hojnacki JL, Deschenes RN, Cluette-Brown JE, Mulligan JJ, Osmolski TV, Rencricca NJ et al. Effect of drinking pattern on plasma lipoproteins and body weight. *Atherosclerosis*. 1991; 88:49–59. PMID: 1878009
49. Peasey A, Bobak M, Malyutina S, Pajak A, Kubinova R, Pikhart H et al. Do lipids contribute to the lack of cardio-protective effect of binge drinking: alcohol consumption and lipids in three eastern European countries. *Alcohol Alcohol*. 2005; 40:431–5. <https://doi.org/10.1093/alcalc/agh161> PMID: 15939709
50. Blazer DG, Wu LT. The epidemiology of at-risk and binge drinking among middle-aged and elderly community adults: National Survey on Drug Use and Health. *Am J Psychiatry*. 2009; 166:1162–9. <https://doi.org/10.1176/appi.ajp.2009.09010016> PMID: 19687131
51. Barnes AJ, Moore AA, Xu H, Ang A, Tallen L, Mirkin M et al. Prevalence and correlates of at-risk drinking among older adults: the project SHARE study. *J Gen Intern Med*. 2010; 25:840–6. <https://doi.org/10.1007/s11606-010-1341-x> PMID: 20396975
52. Mukamal KJ, Jensen MK, Grønbaek M, Stampfer MJ, Manson JE, Pischon T et al. Drinking frequency, mediating biomarkers, and risk of myocardial infarction in women and men. *Circulation*. 2005; 112:1406–13. <https://doi.org/10.1161/CIRCULATIONAHA.105.537704> PMID: 16129796
53. Fernández Jarne E, Martínez Losa E, Serrano Martínez M, Prado-Santamaría M, Brugarolas-Brufau C, Martínez-González MA. Type of alcoholic beverage and first acute myocardial infarction: A case control study in a mediterranean country. *Clin Cardiol*. 2003; 26:313–8. PMID: 12862296
54. Kabagambe EK, Baylin A, Ruiz-Narvaez E, Rimm EB, Campos H. Alcohol intake, drinking patterns, and risk of nonfatal acute myocardial infarction in Costa Rica. *Am J Clin Nutr*. 2005; 82:1336–45. <https://doi.org/10.1093/ajcn/82.6.1336> PMID: 16332668

55. Marques-Vidal P, Duclmetière P, Evans A, Cambou JP, Arveiler D. Alcohol consumption and myocardial infarction: a case-control study in France and Northern Ireland. *Am J Epidemiol.* 1996; 143:1089–93. PMID: [8633596](#)
56. Corrao G, Bagnardi V, Zambon A, La Vecchia C. A meta-analysis of alcohol consumption and the risk of 15 diseases. *Prev Med.* 2004; 38:613–619. <https://doi.org/10.1016/j.ypmed.2003.11.027> PMID: [15066364](#)
